# Supplementary material for: The Venus flytrap attracts insects by the release of volatile organic compounds
Source: PubMed Central journal article supplement (PMC3904726; doi:10.1093/jxb/ert455), 2014-01-13
Supplement: supp_ert455_jexbot106740_file001.pdf [file supp_ert455_jexbot106740_file001.pdf]

## **The Venus flytrap attracts insects by the release of volatile organic compounds**

*Jürgen Kreuzwieser, Ursula Scheerer, Jörg Kruse, Tim Burzlaff, Anne Honsel, Saleh Alfarraj, Plamen Georgiev, Jörg-Peter Schnitzler, Andrea Ghirardo, Ines Kreuzer, Rainer Hedrich, and Heinz Rennenberg*

**Supplemental Figure S1.** Two-dimensional (A) score and (B) scaled-loading plots of partial least square regression (PLSR) computed with VOC emission rates emitted from unfed and fed *D. muscipula* plants. Plants were divided into treatment group (blue) and control group (red). Circles indicate VOC emission rates emitted from treated (○) and control (○) plants at day 0 (unfed), triangles their respective emission rates 4 days after, when treated plants (▲) were fed with insect powder and control plants (▲) remained unfed. The explained variance (in percentage) and the number of principal component are reported in x- and y-axes in both (A) and (B) plots. Ellipse in (A) indicates the tolerance based on Hotelling's  $T^2$  with significance level of 0.05. Numbers and letters in (B) reflect the compounds listed in Table 1, “Feeding” (in blue) show the Y-loading weight. The outer and inner ellipses in (B) indicate 100% and 75% explained variance, respectively.
